# Supplementary material for: A Large-Scale, Higher-Level, Molecular Phylogenetic Study of the Insect Order Lepidoptera (Moths and Butterflies)
Source: PLOS journal article supplement (doi:10.1371/journal.pone.0058568), 2013-03-12
Supplement: S6 (10.1371/journal.pone.0058568.s006) [file journal.pone.0058568.s006]

**Table S4. Synopsis of genes sequenced.\***

| PCR amplicon name | Gene name                                      | Fragment length(s) |
|-------------------|------------------------------------------------|--------------------|
| CAD               | (multiple enzymes for pyrimidine biosynthesis) | 2865               |
| DDC               | dopa decarboxylase                             | 1281               |
| enolase           | enolase                                        | 1134               |
| period            | period                                         | 873                |
| wg                | wingless                                       | 390                |
| 109fin            | gelsolin                                       | 573                |
| 192fin            | glutamyl- and prolyl-tRNA synthetase           | 402                |
| 197fin            | triphosphate isomerase                         | 444                |
| 265fin            | histidyl-tRNA synthetase                       | 447                |
| 268fin            | AMP deaminase                                  | 768                |
| 3007fin           | glucose phosphate dehydrogenase                | 621                |
| 3017fin           | tetrahydrofolate synthase                      | 594                |
| 3070fin           | alanyl-tRNA synthetase                         | 699                |
| 262 fin           | (proteasome subunit)                           | 486                |
| 40fin             | phosphogluconate dehydrogenase                 | 750                |
| 42fin             | (putative GTP-binding protein)                 | 840                |
| 8028fin           | nucleolar cysteine-rich protein                | 324                |
| 8091fin           | glucose phosphate isomerase                    | 666                |
| acc               | acetyl-coA carboxylase                         | 501                |

\* These 19 genes have been used in previous studies, e.g., see reference [17] for the first five genes and reference [22] for the others. CAD, DDC, enolase, and period have multiple amplicons. All others are single amplicons. Fragment lengths do not include the ambiguously aligned characters that were excluded from the final data sets. The lengths of some gene fragments differ slightly from previous studies because the current data set was realigned after the substantial increase in total number and diversity of taxa included.
